# Supplementary material
Source: publisher figshare collection journal article supplement (https://acs.figshare.com/ndownloader/files/4367707)
Supplement: Supplementary file 1 [file 4367707]

# NMR-based structural glycomics for high-throughput screening of carbohydrate-active enzyme specificity

*Romain Irague,<sup>†,‡,‡</sup> Stéphane Massou,<sup>†,‡,‡</sup> Claire Moulis,<sup>†,‡,‡</sup> Olivier Saurel,<sup>‡</sup> Alain Milon,<sup>‡</sup> Pierre Monsan,<sup>†,‡,‡</sup> Magali Remaud-Siméon,<sup>†,‡,‡</sup> Jean-Charles Portais\*<sup>†,‡,‡</sup>, Gabrielle Potocki-Véronèse\*<sup>†,‡,‡</sup>*

Université de Toulouse, INSA, UPS, INP, LISBP, 135 avenue de Rangueil, F-31077 Toulouse, France,  
UMR5504, UMR792 Ingénierie des Systèmes Biologiques et des Procédés, CNRS, INRA, F-31400  
Toulouse, France, CNRS, UPS, Institut de Pharmacologie et de Biologie Structurale (IPBS) ; 205 rte de  
Narbonne, Toulouse, France

<sup>†</sup>Université de Toulouse

<sup>‡</sup>CNRS UMR 5504

<sup>‡</sup>INRA UMR 792

<sup>‡</sup>Institut de Pharmacologie et de Biologie Structurale

\* Corresponding authors: veronese@insa-toulouse.fr; jean-charles.portais@insa-toulouse.fr

## Table of contents

|                                                |           |
|------------------------------------------------|-----------|
| <b>Materials and Methods section.....</b>      | <b>3</b>  |
| <b>Supporting information references .....</b> | <b>6</b>  |
| <b>Figures section.....</b>                    | <b>7</b>  |
| Figure S-1. ....                               | 7         |
| Figure S-2. ....                               | 8         |
| Figure S-3. ....                               | 9         |
| <b>Tables section .....</b>                    | <b>10</b> |
| Table S-1 .....                                | 10        |
| Table S-2.....                                 | 11        |
| Table S-3.....                                 | 12        |

## Materials and Methods section

**DNA manipulations.** A variant library was constructed by using the ISOR method<sup>1</sup> from the parental gene encoding the dextransucrase DSR-S var<sub>del</sub>  $\Delta$ 4N. An *AatII* restriction site was first incorporated in the pBAD *Thio-dsrs* var<sub>del</sub>  $\Delta$ 4N-*His* plasmid<sup>2</sup> by silent mutation using inverse PCR at the position 1881 of the gene *dsr-s* var<sub>del</sub>  $\Delta$ 4N, to generate the pBAD *Thio-dsrs* var<sub>del</sub>  $\Delta$ 4N\_*aatII*1881-*His* plasmid. Then, a 1130 bp cassette, corresponding to the positions 829 to 1958 of the gene *dsr-s* var<sub>del</sub>  $\Delta$ 4N was PCR amplified from the pBAD *Thio-dsrs* var<sub>del</sub>  $\Delta$ 4N\_*aatII*1881-*His* plasmid. Five  $\mu$ g of purified PCR products were digested with 1U of DNaseI in the supplied buffer at 20°C in a final volume of 50  $\mu$ L. The reaction was stopped after 3 min by adding 15  $\mu$ L of 0.5 M EDTA and heating 10 min at 75°C. Fragments were separated on a 2% agarose gel and those with a size between 50-100 bp were extracted using QIAquick Gel Extraction Kit (Qiagen). Gene reassembly was carried out with 100 ng of purified fragments in combination with 2  $\mu$ M of degenerated oligonucleotides mix, to mutate positions D306, F353, N404, W440, D460, H463, T464 and S512 (DSR-S var<sub>del</sub>  $\Delta$ 4N numbering). The reaction mixture (30  $\mu$ L), containing 1U Phusion® High-Fidelity DNA Polymerase (Finnzyme) in the appropriate buffer and 0.4 mM of each dNTPs, was thermocycled according to the following program: 1 denaturation step at 98°C for 30 s; 40 cycles composed of a denaturation step at 98°C for 10 s, 6 successive hybridization steps separated by 4°C each, from 65°C to 41°C for 10 s each and an elongation step at 72°C for 20s; and finally a 2 min step at 72°C. The fully recombined cassettes were isolated from the reassembly products in a last amplification by nested PCR using the primers forK7A3nted (5'-CCACAGTGGGAATGAACTAGTGAAGATATG-3') and revK7A8nted (5'-ATGGCATCTTTACCATAGCGAACACTT-3'). The purified nested PCR products were digested with *SpeI* and *AatII* restriction enzymes and ligated into the pBAD *Thio-dsrs* var<sub>del</sub>  $\Delta$ 4N\_*aatII*1881-*His* plasmid to substitute the parental cassette. The ligation products were precipitated by adding 5 volumes of absolute ethanol and the DNA pellet was rinsed 2 times with 70% ethanol. The resuspended plasmids were transformed into *E. coli* TOP 10 electrocompetent cells and plated on LB agar supplemented with

ampicillin (100 µg/ml). The transformants were growth overnight (ON) at 37°C and the colonies were scraped from the plates for plasmid extraction, constituting the glucansucrase DNA libraries.

**Selection of glucansucrase active clones.** The glucansucrase DNA libraries were transformed into chemiocompetent *E.coli* BL21 AI cells (Invitrogen, Carlsbad, CA) and plated onto LB agar supplemented with 100 µg/ml ampicillin. After overnight growth at 37°C, the cells were scraped, resuspended with physiological water and diluted to an OD<sub>600nm</sub> of  $5 \cdot 10^{-5}$ . The clones were subjected to selection pressure by plating them on 22x22 cm plates containing solid M9 mineral medium (42 mM Na<sub>2</sub>HPO<sub>4</sub>, 22 mM KH<sub>2</sub>PO<sub>4</sub>, 18.7 mM NH<sub>4</sub>Cl, 8.5 mM NaCl,  $2.5 \cdot 10^{-2}$  mM CaCl<sub>2</sub>, 1 mM MgSO<sub>4</sub>) supplemented with 100 µg/ml ampicillin, 0.02 % arabinose (wt/vol) and 146 mM sucrose as the sole carbon source. The plates were incubated 7 days at 20°C allowing enough growth and expression of the recombinant proteins. Glucansucrase positive variants were picked and transferred to 96 well microplates (Nunc™ Brands Products, Roskilde, Denmark) filled with 250 µL LB per well supplemented with 100 µg/ml ampicillin using a Biomek2000 pipettor (Beckman Coulter, Brea, CA). After overnight growth at 30°C under horizontal shaking at 250 rpm, each starter cultures was duplicated into new microplates containing 250 µL LB supplemented with 100 µg/ml ampicillin and 9 % (wt/vol) glycerol. The resulting libraries were stocked at -80°C.

### **Screening of the active glucansucrase library**

***Small-scale expression and oligosaccharides synthesis.*** Starter cultures of active variants were inoculated from storage microplates using the QpixII automate (Genetix, Hampshire, UK). After growth for 24 h at 30°C under agitation, 50 µL of each starter culture were used to inoculate 96-deepwell plates (ABgene, Epsom, UK) containing 500 µL auto-inducing media ZYM-5052<sup>3</sup> supplemented with 100 µg/ml ampicillin and 0.1 % arabinose (wt/vol). Growth and gene expression were conducted during 48 h at 20°C in an incubator-shaker (INFORS HT, Bottmingen, Switzerland). Plates were centrifuged (5 min, 3700 g, 4°C) and the supernatants removed. Bacterial cell pellets were resuspended in 200 µL of

0.5 mg/ml lysozyme solution, incubated 20 min at 37°C and frozen at -80°C for 12 h. After thawing at room temperature, 800 µL of reaction mixture containing sucrose and iso-maltooligosaccharides (1 kDa, Pharmacosmos, Denmark) diluted in buffered deuterium water (50 mM NaAc, 0.05 g/L CaCl<sub>2</sub>, pH 5.2) at a final concentration of 292 mM and 50 mM respectively, were added to each well. Enzymatic reactions were incubated 48 h at 25°C under agitation. After that, 50 µL of TSP-d<sub>4</sub> (trimethylsilyl)propionic acid-2,2,3,3-d<sub>4</sub> acid) in D<sub>2</sub>O were added to each well at a final concentration of 37 mM. The deepwell plates were then loaded onto the flow injection NMR system rack holders and subjected to 1D <sup>1</sup>H NMR analysis.

**NMR spectroscopy.** Measurements were performed by using the BEST system combining a Bruker Avance 600 MHz spectrometer with a Gilson Liquid Handler for sample train preparation and injection. A 5 mm TCi (Triple Cryocooler inverse) probe with a 120 µL active volume cryoFIT (CryoProbe Flow Conversion System) was used. Samples were transferred to the probe with a flow rate of 2.6 ml/min and eliminated after analysis. All NMR data were acquired at 298 K and processed with IconNMR software, requiring 3 min per sample. A ZGPR pulse sequence, for presaturation of the residual water signal, was applied and experiments were carried out using the parameters described in Supplementary tables 1 and 2. The <sup>1</sup>H-signal from D<sub>2</sub>O was used for automatic lock and a gradient shimming was performed on each sample. Before Fourier transformation, the FIDs were multiplied by an exponential function with a line broadening of 0.3 Hz. Spectra were processed with a 64 k zero filling, baseline correction and referenced using the TSP-d<sub>4</sub> signal at 0 ppm.

### **Analysis of the products synthesised by variants S512C, F353W and H463R/T464D/S512T**

**Enzyme production.** Variants were grown in flask containing 50 ml of ZYM-5052 medium supplemented with 100 µg/ml ampicillin and 0.1 % (wt/vol) arabinose. Growth and gene expression were conducted during 24 h at 20°C in an incubator-shaker. Bacterial cells were collected by centrifugation (15 min, 4500g, 4°C) and resuspended in 3 ml of sodium acetate buffer (50 mM NaAc,

0.05 g.L<sup>-1</sup> CaCl<sub>2</sub>, pH 5.2). Cells were sonicated and precipitated by centrifugation (3500 g, 30 min, 4°C), supernatants were used as enzymatic extracts.

**Oligosaccharide and glucan synthesis.** Reactions were carried out at 25°C, using 1 U.ml<sup>-1</sup> of enzymes, in sodium acetate buffer (50 mM NaAc, 0.05 g.L<sup>-1</sup> CaCl<sub>2</sub>, pH 5.2), and 292 mM sucrose for glucan synthesis or 292 mM sucrose and 50 mM iso-maltooligosaccharides for oligosaccharide synthesis, until sucrose depletion. Reactions were stopped by 5 min incubation at 95°C.

**HPLC analysis.** Oligosaccharide analysis was performed by HPAEC-PAD using a Dionex Carbo-pack PA100 column (250 x 4 mm, Dionex). A gradient of sodium acetate in 150 mM NaOH was applied at 1 ml/min flow rate as following: from 0 to 300 mM in 30 min, 300 to 450 mM in 1 s, 450 to 0 mM in 5 min and 0 mM during 10 min. Detection was performed using an ED40 module with a gold electrode.

**NMR spectroscopy.** 1D <sup>1</sup>H NMR spectra were recorded on a Bruker Avance 500MHz spectrometer using a 5 mm z-gradient BBI probe at 298 K, an acquisition frequency of 500.13 MHz and a spectral width of 8012.82 Hz. Oligosaccharide samples were lyophilised and dissolved in 650 µL of D<sub>2</sub>O. Glucan samples were precipitated with one volume of absolute ethanol, recovered by centrifugation, washed with distilled water, lyophilised and dissolved in 650 µL of D<sub>2</sub>O. Chemical shifts are given in ppm by reference to TSP-d4 (δ 0 ppm).

### Supporting information references

- (1) Herman, A.; Tawfik, D. S. *Protein Eng. Des. Sel.* **2007**, *20*, 219-26.
- (2) Moulis, C.; Arcache, A.; Escalier, P. C.; Rinaudo, M.; Monsan, P.; Remaud-Simeon, M.; Potocki-Veronese, G. *FEMS Microbiol. Lett.* **2006**, *261*, 203-10.
- (3) Studier, F. W. *Protein Expr. Purif.* **2005**, *41*, 207-34.

## Figures section

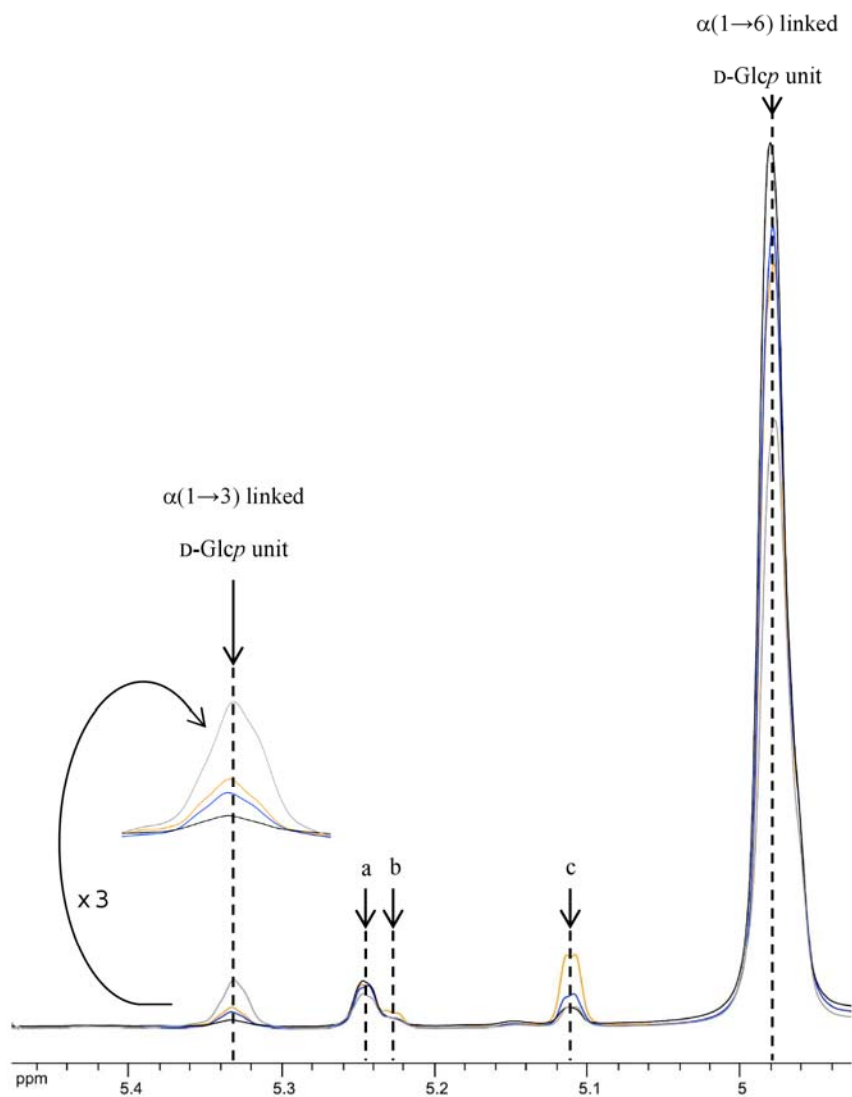

**Figure S-1.** Superimposition of 1D  $^1\text{H}$  NMR spectra of the oligosaccharides synthesized by DSR-S vardel  $\Delta 4\text{N}$  (black) and the three mutants S512C (blue), F353W (orange) and H463R/T464D/S512T (gray). These mutants show an alteration in their capacity to synthesize  $\alpha(1\rightarrow3)$  glucosidic linkages, visible as disturbance of the relative intensities of  $\alpha(1\rightarrow3)$  linked D-Glcp units anomeric proton signals at 5.33 ppm. Spectra were calibrated according to the internal standard TSP-d4 present in each sample at the same concentration ( $^1\text{H} = 0$  ppm, 37 mM). (a)  $\alpha$ -D-Glcp reducing unit, (b) free D-Glcp unit and (c)  $\alpha$ -D-Glcp (1 $\rightarrow$ 5)-D-frup (leucrose).

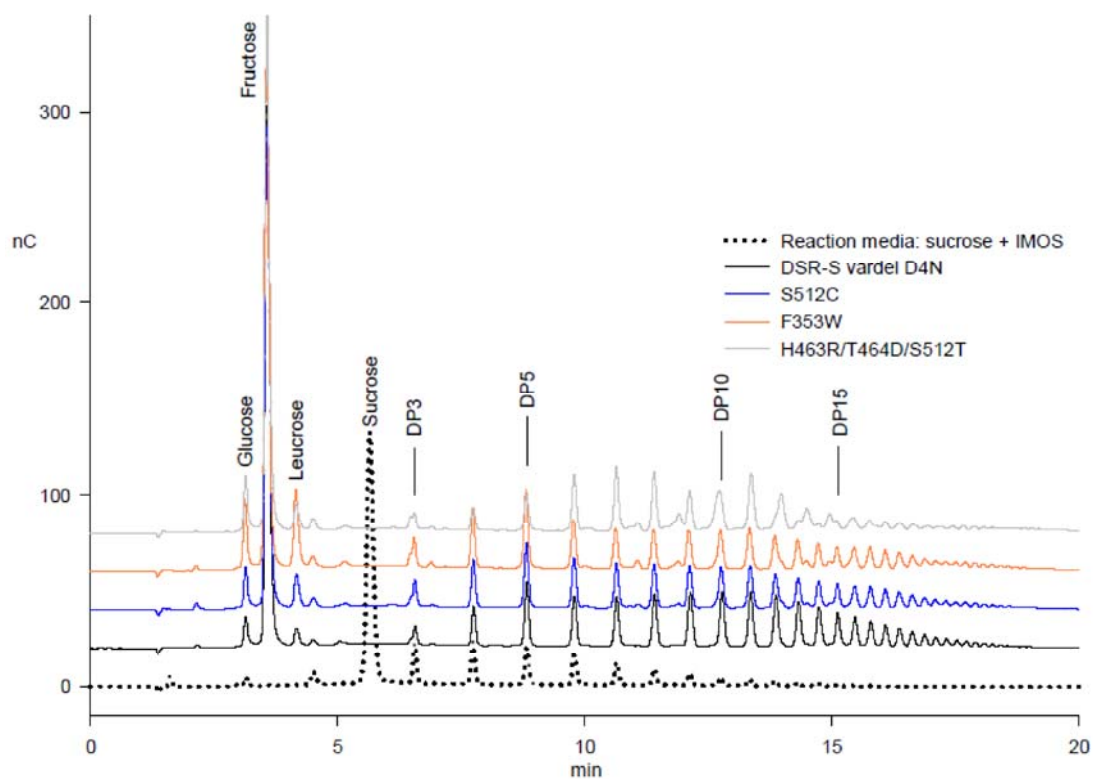

**Figure S-2.** HPAEC-PAD profiles of the reaction products obtained from sucrose and isomaltooligosaccharides by using parental DSR-S varde1  $\Delta$ 4N and variants S512C, F353W and H463R/T464D/S512T. IMOS: Isomalto-oligosaccharides; DP: Polymerisation degree (referenced to IMOS used as acceptors)



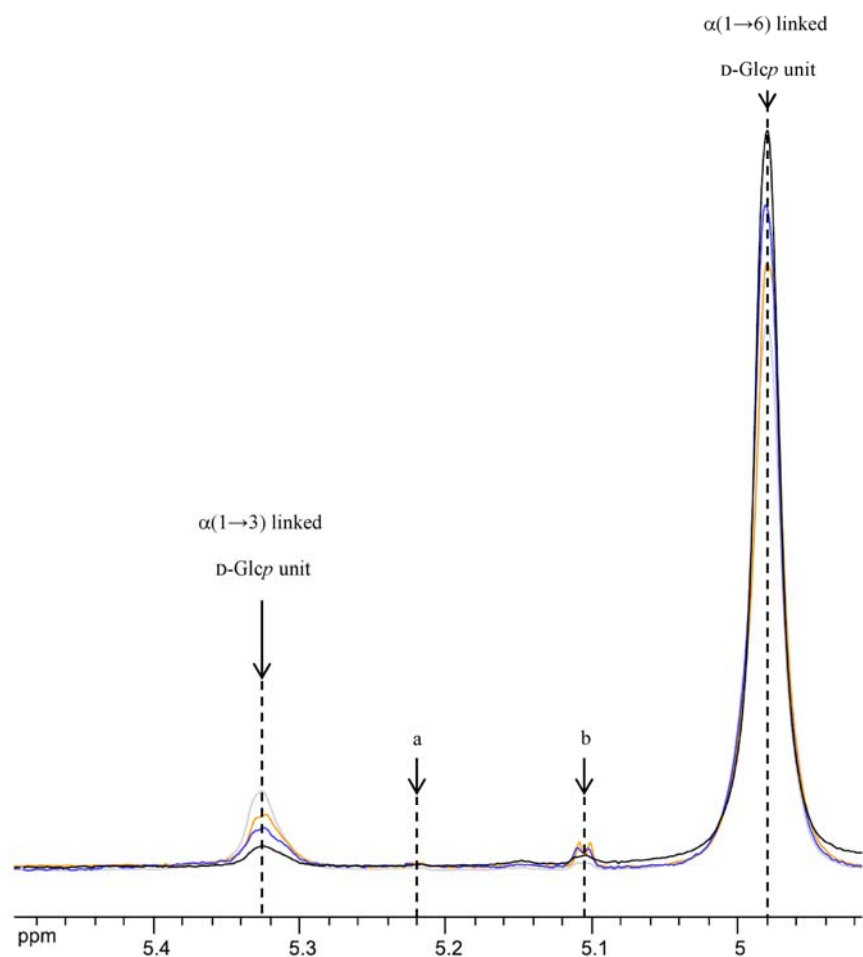

**Figure S-3.** Superimposition of 1D  $^1\text{H}$  NMR spectra of the  $\alpha$ -glucans synthesized by DSR-S varde1  $\Delta 4\text{N}$  (black) and the mutants S512C (blue), F353W (orange) and H463R/T464D/S512T (gray) that show an altered specificity. Spectra were calibrated according to the internal standard TSP-d4 present in each sample at the same concentration ( $^1\text{H} = 0$  ppm, 37 mM). (a)  $\alpha$ -D-Glcp reducing unit, (b)  $\alpha$ -D-Glcp (1 $\rightarrow$ 5)-D-frup.

## Tables section

**Table S-1.** Parameters for sample train preparation and automated direct injection of crude reaction media to the NMR spectrometer.

| Sample train  |    | Gap composition                       | Volume ( $\mu\text{L}$ ) |
|---------------|----|---------------------------------------|--------------------------|
|               | 1  | Push solvent ( $\text{H}_2\text{O}$ ) |                          |
| Trailing gaps | 2  | Gas                                   | 10                       |
|               | 3  | $\text{H}_2\text{O}$                  | 35                       |
|               | 4  | Gas                                   | 10                       |
|               | 5  | Sample                                | 500                      |
| Leading gaps  | 6  | Gas                                   | 10                       |
|               | 7  | Sample                                | 35                       |
|               | 8  | Gas                                   | 10                       |
|               | 9  | $\text{D}_2\text{O}$                  | 50                       |
|               | 10 | Gas                                   | 10                       |

**Table S-2.** NMR measurement parameters.

|                                        |             |
|----------------------------------------|-------------|
| Temperature                            | 298 K       |
| Time domain                            | 32 k        |
| Number of scans                        | 16          |
| Number of dummy scans                  | 4           |
| Relaxation delay                       | 1 s         |
| Acquisition time                       | 1.95 s      |
| Sweep width                            | 8389 Hz     |
| 90° pulse length                       | 8.2 $\mu$ s |
| Presaturation radio frequency<br>field | 12.4 Hz     |

The experiments have been performed on a Bruker Avance 600 MHz spectrometer equipped with a triple resonance TCi cryoProbe. A flow through BEST system coupled with a cryoProbe flow conversion system insert was used to acquire NMR spectra in a continuous mode and to link the probe to a 96 well plates injection automate.

**Table S-3.** <sup>1</sup>H NMR chemical shifts (in ppm) of the synthesized products.

|                                                | Negative control | DSR-S<br>vardel Δ4N | DSR-E               | ASR<br>C-del        |
|------------------------------------------------|------------------|---------------------|---------------------|---------------------|
| β-D-Fruf-(2↔1)-α-D-Glcp <b>H1</b> (sucrose)    | 5,413            |                     |                     |                     |
| α(1→3) linked D-Glcp unit                      |                  | 5,339 ( <b>1</b> )  | 5,34 ( <b>1</b> )   | 5,336 ( <b>10</b> ) |
| α-D-Glcp reducing unit                         |                  | 5,249               | 5,249               | 5,249               |
| free D-Glcp unit                               |                  | 5,232               | 5,231               | 5,229               |
| α(1→6) linked 2,6-di-O-substituted D-Glcp unit |                  |                     | 5,187               |                     |
| α-D-Glcp (1→5)-D-frup (leucrose)               |                  | 5,11                | 5,112               | 5,113               |
| α(1→2) linked D-Glcp unit                      |                  |                     | 5,09 ( <b>5</b> )   |                     |
| α(1→6) linked D-Glcp unit                      | 4,976            | 4,976 ( <b>99</b> ) | 4,977 ( <b>94</b> ) | 4,976 ( <b>90</b> ) |

Anomeric protons were referenced according to internal TSP-d4 (1H = 0 ppm). Numbers into brackets indicates the ratio of α(1→x) linked D-Glcp units involved in the synthesized oligosaccharide primary structures, calculated as follows:

Ratio of α(1→x) linked D-Glcp units =  $\frac{I_x}{I_t} \times 100$ , where  $I_x$  and  $I_t$  correspond to the relative intensities of the anomeric proton signals of α(1→x) linked D-Glcp units and the total α(1→) linked D-Glcp units respectively involved in the synthesized oligosaccharide primary structures.
